# Supplementary material
Source: PubMed Central journal article supplement (PMC3030350)
Supplement: supp_M110.195578_jbc.M110.195578-1.pdf [file supp_M110.195578_jbc.M110.195578-1.pdf]

## SUPPLEMENTARY FIGURE LEGENDS

Supplementary Fig. 1. Electrophoresis of aquaporin Z in BN-PAGE reveals a tetramer. His-tagged aquaporin Z was expressed in bacteria, extracted with 1% DDM, purified on metal affinity resin and electrophoresed in BN-PAGE. Coomassie staining of the BN gel reveals the purified protein migrates at 185kDa (arrowhead), which when corrected by division by 1.8, corresponds to approximately 100kDa, which is consistent with a tetramer made up of 4 25kDa monomers, very similar to the calculated molecular weight of 23.7kDa (45).

Supplementary Figure 2. Diagram showing the chimeras between cldn2 and cldn4. Top row: transgenes detected using the cldn2 antibody; left, wild-type mouse cldn2 (Cldn2); middle, cldn2 with the extracellular domains of human cldn4 (Cldn2 loops4); right, cldn4 with the cytoplasmic carboxyl terminus of cldn2 (Cldn4 tail 2). Bottom row: transgenes detected using the cldn4 antibody; left wild-type human cldn4 (Cldn4); middle, cldn4 with the extracellular domains of mouse cldn2 (Cldn4 loops2); right, cldn2 with the cytoplasmic carboxyl terminus of cldn4 (Cldn2 tail 4).
