# Supplementary material
Source: PubMed Central journal article supplement (PMC3030350)

# Supp Figure 1

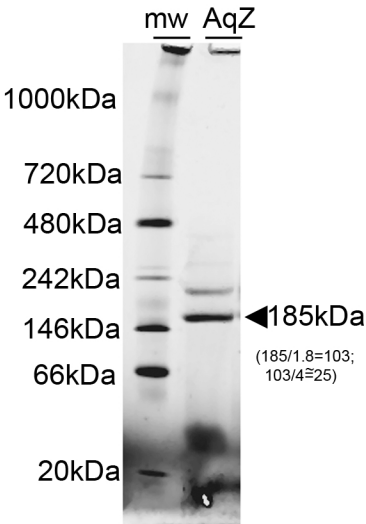

Supplement: supp_M110.195578_jbc.M110.195578-2.pdf [file supp_M110.195578_jbc.M110.195578-2.pdf]

# Supplemental Figure 2

Cldn2

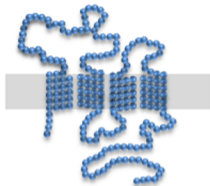

Cldn2 loops4

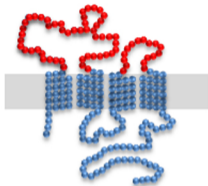

Cldn4 tail2

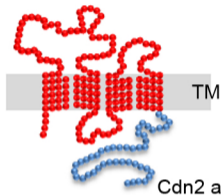

TM

Cdn2 ab

Cldn4

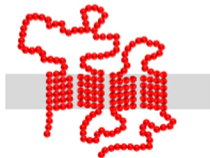

Cldn4 loops2

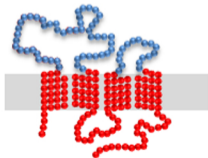

Cldn2 tail4

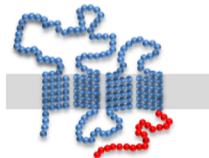

Cldn4 ab

Supplement: supp_M110.195578_jbc.M110.195578-3.pdf [file supp_M110.195578_jbc.M110.195578-3.pdf]
